# Supplementary material
Source: HighWire-hosted journal article supplement (https://bjgp.org/highwire/filestream/43708/field_highwire_adjunct_files/0/BJGP.2021.0691_suppl.pdf)
Supplement: BJGP.2021.0691_suppl.pdf [file BJGP.2021.0691_suppl.pdf]

## Supplementary Appendix S1. The MINDCOVID Working Group

Jordi Alonso, Itxaso Alayo, Manuel Alonso, Mar Álvarez, Benedikt Amann, Franco F. Amigo, Gerard Anmella, Andres Aragón, Nuria Aragonés, Enric Aragonès, Ana Isabel Arizón, Angel Asunsolo, Alfons Ayora, Laura Ballester, Puri Barbas, Josep Basora, Elena Bereciartua, Inés Bravo Ignasi Bolibar, Xavier Bonfill , Alberto Cotillas, Andres Cuartero, Concha de Paz, Isabel del Cura, Maria Jesus del Yerro, Domingo Díaz, Jose Luis Domingo, Jose I. Emparanza, Mireia Espallargues, Meritxell Espuga, Patricia Estevan, M. Isabel Fernandez, Tania Fernandez, Montse Ferrer, Yolanda Ferreres, Giovanna Fico, M. Joao Forjaz, Rosa Garcia Barranco, J. Manuel Garcia TorrecillasC. Garcia-Ribera, Araceli Garrido, Elisa Gil, Marta Gomez, Javier Gomez, Ana Gonzalez Pinto, Josep Maria Haro, Margarita Hernando, Maria Giola Insigna, Milagros Iriberry, Nuria Jimenez, Xavi Jimenez, Amparo Larrauri, Fernando Leon, Nieves Lopez-Fresneña, Carmen Lopez, Mayte Lopez-Atanes Juan Antonio Lopez-Rodriguez, German Lopez-Cortacans, Alba Marcos, Jesus Martin, Vicente Martin, Mercedes Martinez-Cortés, Raquel Martinez-Martinez, Alma D. Martinez de Salazar, Isabel Martinez, Marco Marzola, Nelva Mata, Josep Maria Molina, Juan de Dios Molina, Emilia Molinero, Philippe Mortier, Carmen Muñoz, Andrea Murru, Jorge Olmedo, Rafael M Ortí, Rafael Padrós, Meritxell Pallejà, Raul Parra, Julio Pascual, Jose Maria Pelayo, Rosa Pla, Nieves Plana, Coro Perez Aznar, Beatriz Perez Gomez, Aurora Perez Zapata, Jose Ignacio Pijoan, Elena Polentinos, Portillo-Van Diest , Beatriz Puertolas, Maria Teresa Puig, Alex Quílez, M. Jesus Quintana, Antonio Quiroga, David Rentero, Cristina Rey, Cristina Rius, Carmen Rodriguez-Blazquez, M. Jose Rojas, Yamina Romero, Gabriel Rubio, Mercedes Rumayor, Pedro Ruiz, Margarita Saenz, Jesus Sanchez, Ignacio Sanchez-Arcilla, Ferran Sanz, Consol Serra, Victoria Serra-Sutton, Manuela Serrano, Silvia Sola, Sara Solera, Miguel Soto, Alejandra Tarrago, Natividad Tolosa, Mireia Vazquez, Margarita Viciola, Eduard Vieta, Gemma Vilagut, Sara Yago, Jesus Yañez, Yolanda Zapico, Luis Maria Zorita, Iñaki Zorrilla, Saioa L. Zurbano, and Victor Perez-Solá.

See also in: <https://www.mindcovid.org/home>
